# Supplementary material
Source: PubMed Central journal article supplement (PMC3180202)
Supplement: ci200082t_si_001.pdf [file ci200082t_si_001.pdf]

# Supplemental Information for

## CSAR Benchmark Exercise of 2010: Selection of the protein-ligand complexes

*James B. Dunbar Jr., Richard D. Smith, Chao-Yie Yang, Peter Man-Un Ung, Katrina W. Lexa, Nickolay A. Khazanov, Jeanne A. Stuckey, Shaomeng Wang, and Heather A. Carlson*

### The size of any data set dictates the confidence intervals.

The following relationship from eqn 3 in Bonett and Wright (2000, *Psychometrika*, 65: 23-28) relates Fisher confidence intervals to the sample size  $n$ :

$$n = 4c^2(1 - \theta^2)^2 \left( \frac{z_{\alpha/2}}{w} \right)^2 + b$$

where  $w$  is the width of the interval and  $z_{\alpha/2}$  dictates the confidence: 1.64 for 90%, 1.96 for 95%, and 2.58 for 99%.

The values of  $c$ ,  $b$ , and  $\theta$  are related through the variance ( $\sigma^2$ ) and are dictated by the fitness parameter being evaluated:

| Metric   | $\theta$ | $c^2$        | $b$ | $\sigma^2$                        |
|----------|----------|--------------|-----|-----------------------------------|
| Pearson  | R        | 1            | 3   | $(1-R^2)^2/(n-3)$                 |
| Spearman | $\rho$   | $1+\rho^2/2$ | 3   | $(1+\rho^2/2)(1-\rho^2)^2/(n-3)$  |
| Kendall  | $\tau$   | 0.437        | 4   | $0.437 \times (1-\tau^2)^2/(n-4)$ |

For the full dataset of 343 complexes, the metrics and their confidence intervals are:

| $R^2$ | Pearson R | $w_{95\%}$ for R | 95% interval ( $R \pm w_{95\%}/2$ ) | $w_{90\%}$ for R | 90% interval ( $R \pm w_{90\%}/2$ ) | 95% interval ( $R_{up}^2 - R_{down}^2$ ) for $R^2$ | $w_{95\%}$ for $R^2$ | 90% interval ( $R_{up}^2 - R_{down}^2$ ) for $R^2$ | $w_{90\%}$ for $R^2$ |
|-------|-----------|------------------|-------------------------------------|------------------|-------------------------------------|----------------------------------------------------|----------------------|----------------------------------------------------|----------------------|
| 1     | 1         | 0                | (1.0-1.0)                           | 0                | 1.0-1.0                             | (1.0-1.0)                                          | 0.0                  | 1.0-1.0                                            | 0.0                  |
| 0.99  | 0.995     | 0.002            | (0.996-0.994)                       | 0.002            | 0.996-0.994                         | (0.992-0.988)                                      | 0.004                | 0.992-0.988                                        | 0.004                |
| 0.95  | 0.975     | 0.011            | (0.980-0.969)                       | 0.009            | 0.979-0.970                         | (0.960-0.940)                                      | 0.021                | 0.959-0.941                                        | 0.017                |
| 0.9   | 0.949     | 0.021            | (0.959-0.938)                       | 0.018            | 0.958-0.940                         | (0.920-0.880)                                      | 0.040                | 0.917-0.883                                        | 0.034                |
| 0.8   | 0.894     | 0.043            | (0.916-0.873)                       | 0.036            | 0.912-0.877                         | (0.838-0.762)                                      | 0.076                | 0.832-0.768                                        | 0.064                |
| 0.7   | 0.837     | 0.064            | (0.869-0.805)                       | 0.053            | 0.863-0.810                         | (0.754-0.648)                                      | 0.107                | 0.745-0.656                                        | 0.089                |
| 0.6   | 0.775     | 0.085            | (0.817-0.732)                       | 0.071            | 0.810-0.739                         | (0.668-0.536)                                      | 0.132                | 0.656-0.546                                        | 0.110                |
| 0.5   | 0.707     | 0.106            | (0.760-0.654)                       | 0.089            | 0.752-0.663                         | (0.578-0.428)                                      | 0.150                | 0.565-0.439                                        | 0.126                |
| 0.4   | 0.632     | 0.128            | (0.696-0.569)                       | 0.107            | 0.686-0.579                         | (0.485-0.323)                                      | 0.161                | 0.470-0.335                                        | 0.135                |
| 0.3   | 0.548     | 0.149            | (0.622-0.473)                       | 0.125            | 0.610-0.485                         | (0.387-0.224)                                      | 0.163                | 0.372-0.236                                        | 0.136                |
| 0.2   | 0.447     | 0.170            | (0.532-0.362)                       | 0.142            | 0.518-0.376                         | (0.283-0.131)                                      | 0.152                | 0.269-0.141                                        | 0.127                |
| 0.1   | 0.316     | 0.191            | (0.412-0.221)                       | 0.16             | 0.396-0.236                         | (0.170-0.049)                                      | 0.121                | 0.157-0.056                                        | 0.101                |

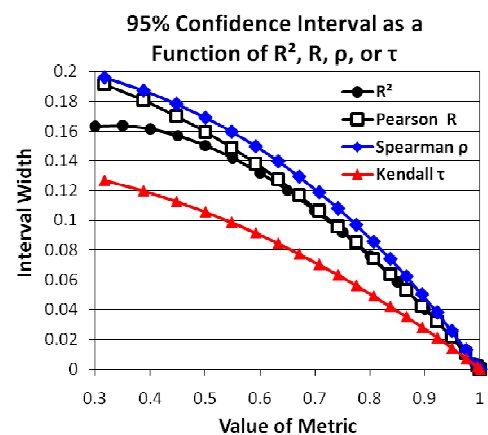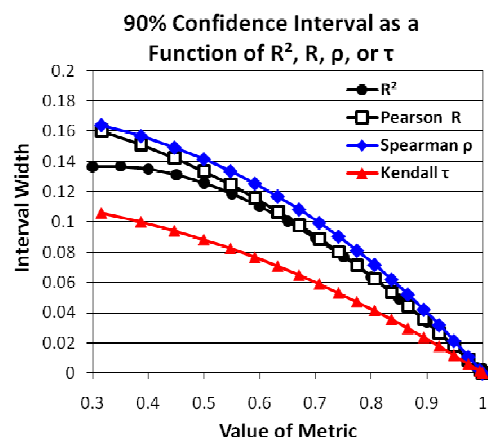

*Small overlaps in the confidence intervals can still lead to statistically significant differences in these metrics if one uses a Levene F-test to evaluate the residuals from the linear regression.*

**Spearman  $\rho$**

| $\rho^2$ | $w_{95\%}$<br>$\rho$ | 95% interval<br>for $\rho$ | $(\rho \pm w_{95\%}/2)$ | $w_{90\%}$<br>for $\rho$ | 90% interval<br>$(\rho \pm w_{90\%}/2)$ |
|----------|----------------------|----------------------------|-------------------------|--------------------------|-----------------------------------------|
| 1        | 1                    | 0                          | 1.0-1.0                 | 0                        | 1.0-1.0                                 |
| 0.99     | 0.995                | 0.003                      | 0.996-0.994             | 0.002                    | 0.996-0.994                             |
| 0.95     | 0.975                | 0.013                      | 0.981-0.968             | 0.011                    | 0.980-0.969                             |
| 0.9      | 0.949                | 0.026                      | 0.961-0.936             | 0.021                    | 0.959-0.938                             |
| 0.8      | 0.894                | 0.050                      | 0.920-0.869             | 0.042                    | 0.915-0.873                             |
| 0.7      | 0.837                | 0.074                      | 0.874-0.800             | 0.062                    | 0.868-0.806                             |
| 0.6      | 0.775                | 0.097                      | 0.823-0.726             | 0.081                    | 0.815-0.734                             |
| 0.5      | 0.707                | 0.119                      | 0.767-0.648             | 0.099                    | 0.757-0.657                             |
| 0.4      | 0.632                | 0.140                      | 0.702-0.563             | 0.117                    | 0.691-0.574                             |
| 0.3      | 0.548                | 0.160                      | 0.628-0.468             | 0.134                    | 0.614-0.481                             |
| 0.2      | 0.447                | 0.178                      | 0.536-0.358             | 0.149                    | 0.522-0.373                             |
| 0.1      | 0.316                | 0.196                      | 0.414-0.218             | 0.164                    | 0.398-0.234                             |

**Kendall  $\tau$**

| $\tau^2$ | $w_{95\%}$<br>$\tau$ | 95% interval<br>for $\tau$ | $(\tau \pm w_{95\%}/2)$ | $w_{90\%}$<br>for $\tau$ | 90% interval<br>$(\tau \pm w_{90\%}/2)$ |
|----------|----------------------|----------------------------|-------------------------|--------------------------|-----------------------------------------|
| 1        | 1                    | 0                          | 1.0-1.0                 | 0                        | 1.0-1.0                                 |
| 0.99     | 0.995                | 0.001                      | 0.996-0.994             | 0.001                    | 0.996-0.994                             |
| 0.95     | 0.975                | 0.007                      | 0.978-0.971             | 0.006                    | 0.978-0.972                             |
| 0.9      | 0.949                | 0.014                      | 0.956-0.942             | 0.012                    | 0.955-0.943                             |
| 0.8      | 0.894                | 0.028                      | 0.909-0.880             | 0.024                    | 0.906-0.883                             |
| 0.7      | 0.837                | 0.042                      | 0.858-0.816             | 0.035                    | 0.854-0.819                             |
| 0.6      | 0.775                | 0.056                      | 0.803-0.746             | 0.047                    | 0.798-0.751                             |
| 0.5      | 0.707                | 0.070                      | 0.742-0.672             | 0.059                    | 0.737-0.678                             |
| 0.4      | 0.632                | 0.084                      | 0.675-0.590             | 0.071                    | 0.668-0.597                             |
| 0.3      | 0.548                | 0.099                      | 0.597-0.498             | 0.082                    | 0.589-0.507                             |
| 0.2      | 0.447                | 0.113                      | 0.504-0.391             | 0.094                    | 0.494-0.400                             |
| 0.1      | 0.316                | 0.127                      | 0.380-0.253             | 0.106                    | 0.369-0.263                             |
